# Supplementary material for: Phylogenetic, epidemiological and functional analyses of the Streptococcus bovis/Streptococcus equinus complex through an overarching MLST scheme
Source: PubMed Central journal article supplement (PMC4915170; doi:10.1186/s12866-016-0735-2), 2016-06-21
Supplement: 12866_2016_735_MOESM1_ESM.pdf [file 12866_2016_735_MOESM1_ESM.pdf]

1 **Additional File 1: Table. Strains used in this study.**

| Species (original designation) | SBSEC (sub)species according to <i>groEL</i> sequence                                                                     | Strain(s)                                       | Country and place of origin | Isolation source                                                        | GenBank accession number | Reference              |
|--------------------------------|---------------------------------------------------------------------------------------------------------------------------|-------------------------------------------------|-----------------------------|-------------------------------------------------------------------------|--------------------------|------------------------|
| <i>Enterococcus faecalis</i>   | <i>n/a</i>                                                                                                                | JH2-2                                           | UK                          | clinical specimen                                                       | AXOI01000000             | [1]                    |
| <i>Lactobacillus rhamnosus</i> | <i>n/a</i>                                                                                                                | GG (ATCC53103)                                  | USA                         | feces of a healthy human                                                | AP011548                 | [2]                    |
| <i>Lactobacillus reuteri</i>   | <i>n/a</i>                                                                                                                | DSM20016 <sup>T</sup>                           | Germany                     | intestine of adult                                                      |                          | [3]                    |
| <i>Lactobacillus plantarum</i> | <i>n/a</i>                                                                                                                | WCFS1                                           | UK                          | human saliva, single colony isolate of NCIMB8826,                       | AL935263                 | [4]                    |
| <i>Lactobacillus plantarum</i> | <i>n/a</i>                                                                                                                | NZ7114                                          | see WCFS1                   | sortaseA knockout mutant of WCFS1                                       |                          | [5]                    |
| <i>S. alactolyticus</i>        | <i>S. alactolyticus</i>                                                                                                   | DSM20728 <sup>T</sup>                           | UK                          | pig intestine                                                           |                          | [6]                    |
| <i>S. bovis</i>                | <i>S. equinus</i>                                                                                                         | ATCC33317 <sup>T</sup><br>DSM20480 <sup>T</sup> | UK                          | cow dung                                                                | AUZG01000000             | [7, 8]                 |
| <i>S. bovis</i>                | <i>Sgp</i>                                                                                                                | ATCC700338                                      | NY, USA                     | synovial fluid from the knee of a 70 year-old man with septic arthritis | AEEL00000000             | [9], HMP <sup>1)</sup> |
| <i>S. bovis</i>                | <i>S. lutetiensis</i>                                                                                                     | ANSES 1366                                      | Gers, Midi-Pyrenees, France | mastitis milk                                                           |                          | [10]                   |
| <i>S. bovis</i>                | <i>Sii</i> :<br>16S match to <i>S. infantarius</i> group;<br>MLST within <i>Sii</i><br><i>groEL</i> = match to <i>Sgm</i> | J2 40-2                                         | Bangladesh                  | fermented cow milk                                                      |                          | [11]                   |
| <i>S. equinus</i>              | <i>S. equinus</i>                                                                                                         | ATCC9812 <sup>T</sup><br>DSM20558 <sup>T</sup>  | UK                          | horse feces                                                             | GL698429                 | [12]                   |
| <i>S. equinus</i>              | <i>S. equinus</i>                                                                                                         | HC5                                             | Ithaca, NY; USA             | cow rumen                                                               | JPGC01000000             | [13]                   |
| <i>S. equinus</i>              | <i>S. equinus</i>                                                                                                         | HSISB1                                          | The Netherlands             | ileostomy effluent                                                      | ASKA01000000             | [14]                   |
| <i>S. equinus</i>              | <i>S. equinus</i>                                                                                                         | JB1                                             | Davis, CA, USA              | cow rumen                                                               | AUZH01000000             | [15, 7]                |
| <i>S. equinus</i>              | <i>S. equinus</i>                                                                                                         | SN033                                           | New Zealand                 | deer feces                                                              | NZ_ATWZ01000000          | 2)                     |

| Species (original designation) | SBSEC (sub)species according to <i>groEL</i> sequence | Strain(s)                                                                                   | Country and place of origin | Isolation source                                  | GenBank accession number | Reference                                         |
|--------------------------------|-------------------------------------------------------|---------------------------------------------------------------------------------------------|-----------------------------|---------------------------------------------------|--------------------------|---------------------------------------------------|
| <i>S. equinus</i>              | <i>S. equinus</i>                                     | B315                                                                                        | New Zealand                 | cow rumen                                         | AUJD01000000             | 2)                                                |
| <i>S. equinus</i>              | <i>S. equinus</i>                                     | 2B                                                                                          | Scotland                    | sheep rumen                                       | JNKQ01000000             | 2)                                                |
| <i>Sii</i>                     | <i>Sii</i>                                            | CJ251, CJ18, CJ246, CJ248, CJ241, CJi0763,                                                  | Kenya                       | fermented camel milk                              | CJ18: CP003295           | [16, 17]                                          |
| <i>Sii</i>                     | <i>Sii</i>                                            | CJ244, CJi0210, CJ249, CJi0271, CJ76, 150A                                                  | Somalia                     | fermented camel milk                              |                          | [16]                                              |
| <i>Sii</i>                     | <i>Sii</i>                                            | AB2B2-5, AV2A(1), AV3B(1), AZV1B(3), B2VA2-2, BEV4C(1), L2VB3-3, LV1A(2), P2VC1-1, P2VC1-2, | Côte d'Ivoire               | fermented cow milk                                |                          | [17]                                              |
| <i>Sii</i>                     | <i>Sii</i>                                            | 11FA-1, 11GY-2, 13AF, 13AY-1, 3AG-1, 6BY-11B, 6C,                                           | Mali                        | fermented cow milk                                |                          | [18]                                              |
| <i>Sii</i>                     | <i>S. equinus</i>                                     | CCUG4214                                                                                    | UK                          | human infant feces                                |                          | [19, 20]                                          |
| <i>Sii</i>                     | <i>Sii</i>                                            | CCUG35647                                                                                   | Sweden                      | human with acute lymphatic leukemia <sup>3)</sup> |                          | <a href="http://www.cug.se">http://www.cug.se</a> |
| <i>Sii</i>                     | <i>Sii</i>                                            | CCUG38214                                                                                   | Sweden                      | human blood, mechanical valve, asthma             |                          | <a href="http://www.cug.se">http://www.cug.se</a> |
| <i>Sii</i>                     | <i>Sii</i>                                            | CCUG38224                                                                                   | Sweden                      | human <sup>3)</sup>                               |                          | <a href="http://www.cug.se">http://www.cug.se</a> |
| <i>Sii</i>                     | <i>Sii</i>                                            | CCUG43820 <sup>T</sup>                                                                      | UK                          | human infant feces                                |                          | [21]                                              |
| <i>Sii</i>                     | <i>Sii</i>                                            | CCUG43821                                                                                   | UK                          | frozen peas                                       |                          | [22]                                              |
| <i>S. lutetiensis</i>          |                                                       | CCUG43822                                                                                   | UK                          | human infant feces                                |                          | [22]                                              |
| <i>Sii</i>                     | <i>Sii</i>                                            | CCUG44960                                                                                   | Sweden                      | human blood, 78-year old man                      |                          | <a href="http://www.cug.se">http://www.cug.se</a> |
| <i>Sii</i>                     | <i>Sii</i>                                            | CCUG46015                                                                                   | Sweden                      | human <sup>3)</sup>                               |                          | <a href="http://www.cug.se">http://www.cug.se</a> |
| <i>S. infantarius</i> group    | <i>S. lutetiensis</i>                                 | SA61, SM51, TA83                                                                            | Ethiopia                    | human infant feces                                |                          | [23]                                              |
| <i>Sii</i>                     | <i>S. lutetiensis</i>                                 | 12290                                                                                       | Israel                      | human blood                                       |                          | [24]                                              |

| Species (original designation) | SBSEC (sub)species according to <i>groEL</i> sequence | Strain(s)             | Country and place of origin | Isolation source                    | GenBank accession number | Reference                                           |
|--------------------------------|-------------------------------------------------------|-----------------------|-----------------------------|-------------------------------------|--------------------------|-----------------------------------------------------|
| <i>Sii</i>                     | <i>Sii</i>                                            | 5147432-1, 5334570    | Israel                      | human blood                         |                          | [24]                                                |
| <i>Sii</i>                     | <i>Sii</i>                                            | P-24                  | Spain                       | colonic polyps                      |                          | [25]                                                |
| <i>Sgg</i>                     | <i>Sgg</i>                                            | ATCC BAA2069          | Germany                     | human blood, infective endocarditis | FR824043                 | [26]                                                |
| <i>Sgg</i>                     | <i>Sgg</i>                                            | ATCC43143             | Belgium                     | human blood                         | AP012053                 | [27]                                                |
| <i>Sgg</i>                     | <i>Sgg</i>                                            | DSM16831 <sup>T</sup> | Australia                   | koala bear feces                    |                          | [28]                                                |
| <i>Sgg</i>                     | <i>Sgg</i>                                            | LMG17956              | Netherlands                 | calf                                | CCBC01000000             | [29]                                                |
| <i>Sgg</i>                     | <i>Sgg</i>                                            | UCN34                 | France                      | human blood, infective endocarditis | NC_013798                | [30]                                                |
| <i>Sgg</i>                     | <i>Sgg</i>                                            | TX20005               | USA                         | heart, human                        | NZ_GL39173               | HMP <sup>1)</sup>                                   |
| <i>Sgm</i>                     | <i>Sgm</i>                                            | DSM15879 <sup>T</sup> | Greece                      | Greek kasseri cheese                |                          | [31]                                                |
| <i>Sgm</i>                     | <i>Sgm</i>                                            | 135D, CJi0257         | Somalia                     | fermented camel milk                |                          | [16]                                                |
| <i>Sgm</i>                     | <i>Sgm</i>                                            | 28F, 34I              | Mali                        | fermented cow milk                  |                          | [18]                                                |
| <i>Sgm</i>                     | <i>Sgm</i>                                            | PV2(3)                | Côte d'Ivoire               | fermented cow milk                  |                          | [17]                                                |
| <i>Sgp</i>                     | <i>Sgp</i>                                            | ATCC43144             | Belgium                     | human blood                         | AP012054                 | [27]                                                |
| <i>Sgp</i>                     | <i>Sgp</i>                                            | DSM15351 <sup>T</sup> | France                      | human cerebrospinal fluid           |                          | [32]                                                |
| <i>S. lutetiensis</i>          | <i>S. lutetiensis</i>                                 | 033                   | China                       | infant feces                        | CP003025                 | [33]                                                |
| <i>S. thermophilus</i>         | n/a                                                   | DSM20259              | Weihestephan, Germany       | yoghurt                             |                          | <a href="http://www.dsmz.de">http://www.dsmz.de</a> |

2 n/a: not applicable; 1) HMP: Human Microbiome Project; 2) DOE Joint Genome Institute - The Hungate 1000. A catalogue of reference  
3 genomes from the rumen microbiome. 3) body site/material of strain isolation (e.g. feces or blood) unknown.

#### 4 **References Supporting Additional File 1**

5 1. Jacob AE, Hobbs SJ. Conjugal transfer of plasmid-borne multiple antibiotic resistance in *Streptococcus faecalis* var. *zymogenes*. J  
6 Bacteriol. 1974;117:360-72.

- 7 2. Silva M, Jacobus NV, Deneke C, Gorbach SL. Antimicrobial substance from a human *Lactobacillus* strain. *Antimicrob Agents*  
8 *Chemother.* 1987;31:1231-3.
- 9 3. Kandler O, Stetter KO, Köhl R. *Lactobacillus reuteri* sp. nov., a new species of heterofermentative lactobacilli. *Zentralblatt Bakteriol*  
10 *Parasitenkd Infekt Hyg.* 1980;C:264-9.
- 11 4. Kleerebezem M, Boekhorst J, van Kranenburg R, Molenaar D, Kuipers OP, Leer R et al. Complete genome sequence of *Lactobacillus*  
12 *plantarum* WCFS1. *Proc Natl Acad Sci U S A.* 2003;100:1990-5.
- 13 5. Remus DM, Bongers RS, Meijerink M, Fusetti F, Poolman B, de Vos P et al. Impact of *Lactobacillus plantarum* sortase on target  
14 protein sorting, gastrointestinal persistence, and host immune response modulation. *J Bacteriol.* 2013;195:502-9.
- 15 6. Farrow JAE, Kruze J, Phillips BA, Bramley AJ, Collins MD. Taxonomic studies on *Streptococcus bovis* and *Streptococcus equinus*:  
16 description of *Streptococcus alactolyticus* sp. nov. and *Streptococcus saccharolyticus* sp. nov. *Syst Appl Microbiol.* 1984;5:467-82.
- 17 7. Benahmed FH, Gopinath GR, Harbottle H, Cotta MA, Luo Y, Henderson C et al. Draft genome sequences of *Streptococcus bovis*  
18 strains ATCC 33317 and JB1. *Genome Announc.* 2014;2.
- 19 8. Shattock PMF. The streptococci of group D; serological grouping of *Streptococcus bovis* and observations on serologically refractory  
20 group D strains. *J Gen Microbiol.* 1949;3:80-92.
- 21 9. Grant RJ, Shang WY, Whitehead TR. Isolated septic arthritis due to *Streptococcus bovis*. *Clin Infect Dis.* 1997;24:1021.
- 22 10. Chuzeville S, Puymège A, Madec JY, Haenni M, Payot S. Characterization of a new CAMP factor carried by an integrative and  
23 conjugative element in *Streptococcus agalactiae* and spreading in streptococci. *PLoS One.* 2012;7:e48918.

- 24 11. Rashid MH, Togo K, Ueda M, Miyamoto T. Identification and characterization of dominant lactic acid bacteria isolated from  
25 traditional fermented milk 'Dahi' in Bangladesh. *World J Microbiol Biotechnol.* 2007;23:125-33.
- 26 12. Andrewes FW, Horder TJ. A study of the streptococci pathogenic for man. *Lancet.* 1906;2:708-13.
- 27 13. Mantovani HC, Kam DK, Ha JK, Russell JB. The antibacterial activity and sensitivity of *Streptococcus bovis* strains isolated from the  
28 rumen of cattle. *FEMS Microbiol Ecol.* 2001;37:223-9.
- 29 14. Van den Bogert B, Boekhorst J, Herrmann R, Smid EJ, Zoetendal EG, Kleerebezem M. Comparative genomics analysis of  
30 *Streptococcus* isolates from the human small intestine reveals their adaptation to a highly dynamic ecosystem. *PLoS One.* 2013;8:e83418.
- 31 15. Russell JB, Baldwin RL. Substrate preferences in rumen bacteria: evidence of catabolite regulatory mechanisms. *Appl Environ*  
32 *Microbiol.* 1978;36:319-29.
- 33 16. Jans C, Bugnard J, Njage PMK, Lacroix C, Meile L. Lactic acid bacteria diversity of African raw and fermented camel milk products  
34 reveals a highly competitive, potentially health-threatening predominant microflora. *LWT-Food Sci Technol.* 2012;47:371-9.
- 35 17. Jans C, Kaindi DWM, Böck D, Njage PMK, Kouamé-Sina SM, Bonfoh B et al. Prevalence and comparison of *Streptococcus*  
36 *infantarius* subsp. *infantarius* and *Streptococcus gallolyticus* subsp. *macedonicus* in raw and fermented dairy products from East and  
37 West Africa. *Int J Food Microbiol.* 2013;167:186-95.
- 38 18. Wullschleger S, Lacroix C, Bonfoh B, Sissoko-Thiam A, Hugenschmidt S, Romanens E et al. Analysis of lactic acid bacteria  
39 communities and their seasonal variations in a spontaneously fermented dairy product (Malian fènè) by applying a cultivation/genotype-  
40 based binary model. *Int Dairy J.* 2013;29:28-35.

- 41 19. Biarc J, Nguyen IS, Pini A, Gossé F, Richert S, Thiersé D et al. Carcinogenic properties of proteins with pro-inflammatory activity  
42 from *Streptococcus infantarius* (formerly *S. bovis*). *Carcinogenesis*. 2004;25:1477-84.
- 43 20. Sharpe ME, Shattock PM. The serological typing of group D streptococci associated with outbreaks of neonatal diarrhoea. *J Gen*  
44 *Microbiol*. 1952;6:150-65.
- 45 21. Sharpe ME. Group D streptococci in the faeces of healthy infants and of infants with neonatal diarrhoea. *J Hyg (Lond)*. 1952;50:209-  
46 28.
- 47 22. Schlegel L, Grimont F, Collins MD, Régnault B, Grimont PAD, Bouvet A. *Streptococcus infantarius* sp. nov., *Streptococcus*  
48 *infantarius* subsp. *infantarius* subsp. nov. and *Streptococcus infantarius* subsp. *coli* subsp. nov., isolated from humans and food. *Int J Syst*  
49 *Evol Microbiol*. 2000;50:1425-34.
- 50 23. Birri DJ, Brede DA, Tessema GT, Nes IF. Bacteriocin production, antibiotic susceptibility and prevalence of haemolytic and  
51 gelatinase activity in faecal lactic acid bacteria isolated from healthy Ethiopian infants. *Microb Ecol*. 2013;65:504-16.
- 52 24. Lazarovitch T, Shango M, Levine M, Brusovansky R, Akins R, Hayakawa K et al. The relationship between the new taxonomy of  
53 *Streptococcus bovis* and its clonality to colon cancer, endocarditis, and biliary disease. *Infection*. 2013;41:329-37.
- 54 25. Romero B, Morosini M-I, Loza E, Rodríguez-Baños M, Navas E, Cantón R et al. Reidentification of *Streptococcus bovis* isolates  
55 causing bacteremia according to the new taxonomy criteria: still an issue? *J Clin Microbiol*. 2011;49:3228-33.
- 56 26. Hinse D, Vollmer T, Rückert C, Blom J, Kalinowski J, Knabbe C et al. Complete genome and comparative analysis of *Streptococcus*  
57 *gallolyticus* subsp *gallolyticus*, an emerging pathogen of infective endocarditis. *BMC Genomics*. 2011;12:400.

- 58 27. Lin IH, Liu T-T, Teng Y-T, Wu H-L, Liu Y-M, Wu K-M et al. Sequencing and comparative genome analysis of two pathogenic  
59 *Streptococcus gallolyticus* subspecies: genome plasticity, adaptation and virulence. PLoS One. 2011;6:e20519.
- 60 28. Osawa R, Fujisawa T, Sly LI. *Streptococcus gallolyticus* sp. nov.; gallate degrading organisms formerly assigned to *Streptococcus*  
61 *bovis*. Syst Appl Microbiol. 1995;18:74-8.
- 62 29. Romero-Hernández B, Tedim AP, Sánchez-Herrero JF, Librado P, Rozas J, Muñoz G et al. *Streptococcus gallolyticus* subsp.  
63 *gallolyticus* from human and animal origins: genetic diversity, antimicrobial susceptibility, and characterization of a vancomycin-resistant  
64 calf isolate carrying a *vanA*-Tn1546-like element. Antimicrob Agents Chemother. 2015;59:2006-15.
- 65 30. Rusniok C, Couvé E, Da Cunha V, El Gana R, Zidane N, Bouchier C et al. Genome sequence of *Streptococcus gallolyticus*: insights  
66 into its adaptation to the bovine rumen and its ability to cause endocarditis. J Bacteriol. 2010;192:2266-76.
- 67 31. Tsakalidou E, Zoidou E, Pot B, Wassill L, Ludwig W, Devriese LA et al. Identification of streptococci from Greek Kasseri cheese and  
68 description of *Streptococcus macedonicus* sp. nov. Int J Syst Bacteriol. 1998;48:519-27.
- 69 32. Poyart C, Quesne G, Trieu-Cuot P. Taxonomic dissection of the *Streptococcus bovis* group by analysis of manganese-dependent  
70 superoxide dismutase gene (*sodA*) sequences: reclassification of '*Streptococcus infantarius* subsp. *coli*' as *Streptococcus lutetiensis* sp.  
71 nov. and of *Streptococcus bovis* biotype II.2 as *Streptococcus pasteurianus* sp. nov. Int J Syst Evol Microbiol. 2002;52:1247-55.
- 72 33. Jin D, Chen C, Li L, Lu S, Li Z, Zhou Z et al. Dynamics of fecal microbial communities in children with diarrhea of unknown  
73 etiology and genomic analysis of associated *Streptococcus lutetiensis*. BMC Microbiol. 2013;13:141.

74
