# Supplementary material for: Phylogenetic, epidemiological and functional analyses of the Streptococcus bovis/Streptococcus equinus complex through an overarching MLST scheme
Source: PubMed Central journal article supplement (PMC4915170; doi:10.1186/s12866-016-0735-2), 2016-06-21
Supplement: 12866_2016_735_MOESM2_ESM.pdf [file 12866_2016_735_MOESM2_ESM.pdf]

1 **Additional File 2: Table. Primers developed and used in this study.** Primers were designed  
 2 for the *Sii*/SBSEC MLST scheme of housekeeping genes and identification based on *groEL*, *lacS*  
 3 and *lacZ* genes.

| Primer name                                                                       | sequence (5'-3') <sup>1)</sup>                                                                              | target gene                                           | amplicon size [bp] | gene used as target in MLST of other streps            |
|-----------------------------------------------------------------------------------|-------------------------------------------------------------------------------------------------------------|-------------------------------------------------------|--------------------|--------------------------------------------------------|
| ddl-fw<br>ddl-rev                                                                 | CTT ACG TGA CTT ATG TTG AAG G<br>CCA AAG AAG TGG ATA CAT TGA C                                              | D-alanine-D-alanine ligase                            | 522                | <i>S. uberis</i>                                       |
| gki-fw2<br>gki-rev<br>gki-fw6.2-ala <sup>2)</sup><br>gki-rev1.2-ala <sup>2)</sup> | TGA ACT GGG CAC ACA CTG<br>CTG GGT TYA AGA TGT TTG CG<br>GGG MTC WCC TGG AGC TGT<br>PGC AGC WGA HAC DCC ACC | glucokinase                                           | 521                | <i>S. pneumoniae</i>                                   |
| glnA-fw<br>glnA-rev                                                               | GCT GTT GCA GGT TTG ATC TG<br>TAC AGT GCA TAC CTG AAC CG                                                    | glutamine synthetase                                  | 478                | group B streptococci                                   |
| groEL-fw<br>groEL-rev                                                             | GGT TCA CCA CTT ATC ACW AAT G<br>ATC ACC GTC AAG TTC AAG TTC                                                | <i>groEL</i> heat shock protein<br><i>cpn60/hsp60</i> | 1167               | only used for (sub)species identification              |
| lacZ-6.2<br>lacZ-17rev                                                            | TTC CTC AAG AAT CAA ATG CTG<br>CCA CAA GAC CAA ATG ATA ACA C                                                | $\beta$ -galactosidase<br><i>lacZ</i>                 | 1027               | only used for <i>lacZ</i> amplification and sequencing |
| lacS-8<br>lacS-18.1rev                                                            | GCG TGA CGT GCT TCA GTC<br>GAT TGA ATA CAG TTG TTG GTT TG                                                   | lactose symporter/antipporter<br><i>lacS</i>          | 501                | only used for <i>lacS</i> amplification and sequencing |
| mutS-fw<br>mutS-rev                                                               | GTG CCA GAT TAY TTC TTC CG<br>GCT TCC ATC ATT TCC ACC AT                                                    | DNA mismatch repair ATPase                            | 581                | <i>S. suis</i>                                         |
| mutS2-fw<br>mutS2-rev                                                             | CCA AAT ACT GGT GGT AAG AC<br>TCA AAC GCT CTG CTT CAT TG                                                    | mismatch repair ATPase                                | 529                | <i>Sii</i>                                             |
| pheS-fw<br>pheS-rev                                                               | GCT AAA TTG GCT GAA ATG CG<br>ACA CGY CCT GGT GAR ATC AT                                                    | phenylalanyl tRNA synthetase                          | 557                | group B streptococci                                   |
| proS-fw<br>proS-rev2                                                              | CTG CTA ACC TTG AAA TGG CA<br>AAC GTA TTC CGC TTC AAA ATC                                                   | prolyl tRNA synthetase                                | 455                | <i>Sii</i>                                             |
| pyrE-fw<br>pyrE-rev                                                               | AGC ATC ACA AAT TGC ATC AG<br>ACA TCA GCA CCT TCA CGT TC                                                    | orotate phosphoribosyl transferase                    | 426                | <i>S. salivarius</i>                                   |
| thrtRNA-syn-fw<br>thrtRNA-syn-rev                                                 | CCA CCG TAA ACT TGG TAA AG<br>TGW GCA TTT TCC CAC ATT TC                                                    | threonyl tRNA synthetase                              | 606                | <i>S. salivarius</i>                                   |
| tpi fw3<br>tpi-rev                                                                | ATC GCT GGT AAC TGG AAA ATG<br>CGA TAG CCC AGA TTG GTT CG                                                   | triosephosphate isomerase                             | 410                | <i>S. zooepidemicus</i>                                |

4 <sup>1)</sup> mixed base sites according to IUB code <sup>2)</sup> modified primers to amplify the same gene region in  
 5 *S. alactolyticus*.
