# Supplementary material for: Phylogenetic, epidemiological and functional analyses of the Streptococcus bovis/Streptococcus equinus complex through an overarching MLST scheme
Source: PubMed Central journal article supplement (PMC4915170; doi:10.1186/s12866-016-0735-2), 2016-06-21
Supplement: 12866_2016_735_MOESM3_ESM.pdf [file 12866_2016_735_MOESM3_ESM.pdf]

1 **Additional File 3: Table. MLST candidate loci used in this study.** All 30 candidate loci which  
2 were used in this study were selected from literature and MLST.net (<http://www.mlst.net/>).  
3 Conserved housekeeping genes were selected on the basis of maximal nucleotide divergence for  
4 intraspecies differentiation. All loci which are marked with an asterisk were used for the final  
5 SBSEC MLST scheme.

| candidate loci                                         | MLST and loci originally selected for organism | references |
|--------------------------------------------------------|------------------------------------------------|------------|
| 3-phosphoshikimate-3-carboxyvinyltransferase           | <i>Sii</i>                                     | this study |
| glucokinase*                                           | <i>S. pneumoniae</i>                           | [1]        |
| $\alpha$ -keto- $\beta$ -hydroxylacid reductoisomerase | salivarius group                               | [2]        |
| amino acid ABC transporter                             | group B streptococci                           | [3]        |
| aspartate kinase                                       | <i>S. suis</i>                                 | [4]        |
| D-alanine-D-alanine ligase*                            | <i>S. uberis</i>                               | [5]        |
| DNA polymerase III                                     | salivarius group                               | [6]        |
| endopeptidase O                                        | salivarius group                               | [6]        |
| glutamate racemase                                     | <i>S. pyogenes</i>                             | [7]        |
| glutamine synthetase*                                  | group B streptococci                           | [3]        |
| L-serine dehydratase, $\beta$ subunit                  | group B streptococci                           | [3]        |
| L-serine dehydratase, $\alpha$ subunit                 | group B streptococci                           | [3]        |
| <i>groEL</i> , hsp60 chaperone                         | <i>S. uberis</i>                               | [8]        |
| methionine aminopeptidase                              | <i>Sii</i>                                     | this study |
| DNA mismatch repair ATPase*                            | <i>S. suis</i>                                 | [4]        |
| mismatch repair ATPase*                                | <i>Sii</i>                                     | this study |
| orotate phosphoribosyltransferase*                     | salivarius group                               | [2]        |
| peroxidase resistance gene                             | <i>S. pneumoniae</i>                           | [1]        |
| phenylalanyl tRNA synthetase*                          | group B streptococci                           | [3]        |
| prolyl tRNA synthetase*                                | <i>Sii</i>                                     | this study |
| recombination protein A                                | <i>Sii</i>                                     | this study |
| ribonucleoside-diphosphate reductase, major subunit    | <i>S. zooepidemicus</i>                        | [9]        |
| ribonucleoside-diphosphate reductase, minor subunit    | <i>S. zooepidemicus</i>                        | [9]        |
| shikimate/quininate dehydrogenase                      | <i>S. pneumoniae</i>                           | [1]        |
| signal peptidase I                                     | <i>S. pneumoniae</i>                           | [1]        |
| threonyl tRNA synthetase*                              | salivarius group                               | [6]        |
| thymidine kinase                                       | <i>S. uberis</i>                               | [5]        |
| transketolase                                          | <i>S. vestibularis</i>                         | [6]        |
| triosephosphate isomerase*                             | <i>S. zooepidemicus</i>                        | [9]        |
| xanthine phosphoribosyltransferase                     | <i>S. pneumoniae</i>                           | [1]        |

6

7

8

## 9 **References supporting Additional File 3**

- 10 1. Enright MC, Spratt BG. A multilocus sequence typing scheme for *Streptococcus pneumoniae*: identification of  
11 clones associated with serious invasive disease. *Microbiology*. 1998;144:3049-60.
- 12 2. Delorme C. Safety assessment of dairy microorganisms: *Streptococcus thermophilus*. *Int J Food Microbiol*.  
13 2008;126:274-7.
- 14 3. Jones N, Bohnsack JF, Takahashi S, Oliver KA, Chan MS, Kunst F et al. Multilocus sequence typing system for  
15 group B *Streptococcus*. *J Clin Microbiol*. 2003;41:2530-6.
- 16 4. King SJ, Leigh JA, Heath PJ, Luque I, Tarradas C, Dowson CG et al. Development of a multilocus sequence  
17 typing scheme for the pig pathogen *Streptococcus suis*: identification of virulent clones and potential capsular  
18 serotype exchange. *J Clin Microbiol*. 2002;40:3671-80.
- 19 5. Coffey TJ, Pullinger GD, Urwin R, Jolley KA, Wilson SM, Maiden MC et al. First insights into the evolution of  
20 *Streptococcus uberis*: a multilocus sequence typing scheme that enables investigation of its population biology. *Appl*  
21 *Environ Microbiol*. 2006;72:1420-8.
- 22 6. Delorme C, Poyart C, Ehrlich SD, Renault P. Extent of horizontal gene transfer in evolution of streptococci of the  
23 *salivarius* group. *J Bacteriol*. 2007;189:1330-41.
- 24 7. Enright MC, Spratt BG, Kalia A, Cross JH, Bessen DE. Multilocus sequence typing of *Streptococcus pyogenes*  
25 and the relationships between *emm* type and clone. *Infect Immun*. 2001;69:2416-27.
- 26 8. Zadoks RN, Schukken YH, Wiedmann M. Multilocus sequence typing of *Streptococcus uberis* provides sensitive  
27 and epidemiologically relevant subtype information and reveals positive selection in the virulence gene *pauA*. *J Clin*  
28 *Microbiol*. 2005;43:2407-17.
- 29 9. Webb K, Jolley KA, Mitchell Z, Robinson C, Newton JR, Maiden MCJ et al. Development of an unambiguous  
30 and discriminatory multilocus sequence typing scheme for the *Streptococcus zooepidemicus* group. *Microbiol-SGM*.  
31 2008;154:3016-24.

32
