# Supplementary material for: Phylogenetic, epidemiological and functional analyses of the Streptococcus bovis/Streptococcus equinus complex through an overarching MLST scheme
Source: PubMed Central journal article supplement (PMC4915170; doi:10.1186/s12866-016-0735-2), 2016-06-21
Supplement: 12866_2016_735_MOESM4_ESM.pdf [file 12866_2016_735_MOESM4_ESM.pdf]

1 **Additional File 4: Table. Sequence identity matrix of 772-bp *groEL* fragments of SBSEC species.**

|                       | Sequence identity range [%] |                       |                                |                               |                               |                               |
|-----------------------|-----------------------------|-----------------------|--------------------------------|-------------------------------|-------------------------------|-------------------------------|
|                       | <i>Sii</i>                  | <i>S. lutetiensis</i> | <i>S. equinus</i>              | <i>Sgg</i>                    | <i>Sgp</i>                    | <i>Sgm</i>                    |
| <i>Sii</i>            | 99.3-100.0                  | 94.9-95.4             | 91.9-93.3 (98.1) <sup>1</sup>  | 90.1-90.6                     | 90.4-90.7                     | 90.1-90.5                     |
| <i>S. lutetiensis</i> |                             | 99.4-100.0            | 92.2-93.6 (95.5) <sup>1</sup>  | 90.7-91.0                     | 91.1-91.4                     | 90.6-91.0                     |
| <i>S. equinus</i>     |                             |                       | (92.8) <sup>1</sup> 97.5-100.0 | (90.6) <sup>1</sup> 91.6-93.5 | (91.3) <sup>1</sup> 92.2-93.3 | (90.6) <sup>1</sup> 91.5-93.1 |
| <i>Sgg</i>            |                             |                       |                                | 99.2-100.0                    | 98.1-98.7                     | 98.8-99.2                     |
| <i>Sgp</i>            |                             |                       |                                |                               | 100.0                         | 97.7-97.9                     |
| <i>Sgm</i>            |                             |                       |                                |                               |                               | 99.8-100.0                    |

2 <sup>1</sup> Sequence identity value for *S. equinus* JB1 is given in () due to its high divergence within its species
